# Supplementary material for: Detection and Complete Genome Analysis of Circoviruses and Cycloviruses in the Small Indian Mongoose (Urva auropunctata): Identification of Novel Species
Source: Viruses. 2021 Aug 27;13(9):1700. doi: 10.3390/v13091700 (PMC8471302; doi:10.3390/v13091700)
Supplement: Supplementary file 1 [file viruses-13-01700-s001.zip]

Archive with 7 entries (7 files):
- Supplementary material S1.pdf
- Supplementary material S2.pdf
- Supplementary material S3.pdf
- Supplementary material S4.pdf
- Supplementary material S5.pdf
- Supplementary material S6.pdf
- Supplementary material S7.pdf
