# Supplementary material for: Detection and Complete Genome Analysis of Circoviruses and Cycloviruses in the Small Indian Mongoose (Urva auropunctata): Identification of Novel Species
Source: Viruses. 2021 Aug 27;13(9):1700. doi: 10.3390/v13091700 (PMC8471302; doi:10.3390/v13091700)
Supplement: Supplementary file 1 [file viruses-13-01700-s001.zip › Supplementary material S1.pdf]

**Supplementary material S1.** Additional primers used in inverse nested PCRs to amplify the complete genomes of mongoose associated circoviruses and cycloviruses.

| Mongoose associated circovirus | Primer name                | Primer sequence (5'-3')                      | Primer position             |
|--------------------------------|----------------------------|----------------------------------------------|-----------------------------|
| <b>Mon-1 and -29</b>           | Mon-1-Circo-F1             | ACC CGG AAG TCT ACA TCC GGC ATG <sup>1</sup> | nt 590-nt 613 <sup>2</sup>  |
|                                | Mon-1-Circo-R1             | CTG GCG CGA GGG ACA TCC AAT CTC <sup>1</sup> | nt 510-nt 487 <sup>2</sup>  |
|                                | Mon-1-Circo-Nested PCR-F2  | ACT ACG TGA ATG CTG CTG GAC TGG <sup>1</sup> | nt 629-nt 652 <sup>2</sup>  |
|                                | Mon-1-Circo-Nested PCR-R2  | GAT TCT CCA GAT CCG TCC CCC TCG <sup>1</sup> | nt 454-nt 431 <sup>2</sup>  |
| <b>Mon-66</b>                  | Mon-66-Circo-F1            | CGA CCT GCT AGC AAT GAA GAA GGC <sup>3</sup> | nt 468-nt 491 <sup>4</sup>  |
|                                | Mon-66-Circo-R1            | GTA GGT CCA TGG TCC GTC CTG TC <sup>3</sup>  | nt 435-nt 413 <sup>4</sup>  |
|                                | Mon-66-Circo-Nested PCR-F2 | GAC GAA GGA CAG AGC GAG AAG G <sup>3</sup>   | nt 496-nt 517 <sup>4</sup>  |
|                                | Mon-66-Circo-Nested PCR-R2 | TGT CTT CTT TGC TGC AGT AGG CG <sup>3</sup>  | nt 409-nt 387 <sup>4</sup>  |
|                                |                            |                                              |                             |
| Mongoose associated cyclovirus |                            |                                              |                             |
| <b>Mon-20 and -24</b>          | Mon-24-Cyclo-F1            | GGC AGG CAC GTG GTT TGA ACA G <sup>5</sup>   | nt 456-nt 477 <sup>6</sup>  |
|                                | Mon-24-Cyclo-R1            | TGC CTT CTC AAT ATG GAT TGC GTC <sup>5</sup> | nt 417-nt 394 <sup>6</sup>  |
|                                | Mon-24-Cyclo-Nested PCR-F2 | ATT TGG AGT CCG TCG TAT CTG CTA <sup>5</sup> | nt 509-nt 532 <sup>6</sup>  |
|                                | Mon-24-Cyclo-Nested PCR-R2 | TTG ATG GCA CTG AAG CGC ATG G <sup>5</sup>   | nt 380-nt359 <sup>6</sup>   |
| <b>Mon-32</b>                  | Mon-32-Cyclo-F1            | ACA ACG CTA CGA GAT ATT GCC AC <sup>7</sup>  | nt 385-nt 407 <sup>8</sup>  |
|                                | Mon-32-Cyclo-R1            | CGT CGG ATC CAT TTG CCT TCT C <sup>7</sup>   | nt 268-nt 247 <sup>8</sup>  |
|                                | Mon-32-Cyclo-Nested PCR-F2 | CAT ACG CTA TTT CCG TGG CAT CC <sup>7</sup>  | nt 426-nt 448 <sup>8</sup>  |
|                                | Mon-32-Cyclo-Nested PCR-R2 | GCT TCT TGA TGG TAC TGT AGC GTG <sup>7</sup> | nt 223-nt 200 <sup>8</sup>  |
| <b>Mon-58, -60 and -62</b>     | Mon-58-Cyclo-F1            | CTA AGT CTG GCG AGG TAT GGA TGC <sup>9</sup> | nt 427-nt 450 <sup>10</sup> |
|                                | Mon-58-Cyclo-R1            | GTT CCT TTA GCC GGT TCA ATG TGC <sup>9</sup> | nt 400-nt 377 <sup>10</sup> |
|                                | Mon-58-Cyclo-Nested PCR-F2 | CGG AGA ACC TAG TAC TCA AGG AGC <sup>9</sup> | nt 452-nt 475 <sup>10</sup> |
|                                | Mon-58-Cyclo-Nested PCR-R2 | TCC TAA CGC TTG AGA ATC TCC GGG <sup>9</sup> | nt 357-nt 334 <sup>10</sup> |

The primer sequences were designed manually following multiple alignment/from the partial Rep-encoding ORF sequence/s of Mon-1 and -29 <sup>1</sup>, Mon-66 <sup>3</sup>, Mon-20 and -24 <sup>5</sup>, Mon-32 <sup>7</sup>, and Mon-58, -60 and -62 <sup>9</sup>. The partial Rep-encoding ORF (~400 bp) of the mongoose associated circoviruses and cycloviruses were amplified by nested PCR assays using pan-*rep* primers (CV-F1, CV-R1, CV-F2 and CV-R2) as described previously [3].

Nucleotide (nt) position corresponds to that of the complete genome sequence of mongoose associated circovirus Mon-1 and -29 <sup>2</sup> and Mon-66 <sup>4</sup>, and reverse complement of complete genome sequence of mongoose associated cyclovirus Mon-20 and -24 <sup>6</sup>, Mon-32 <sup>8</sup>, and Mon-58, -60 and -62 <sup>10</sup>. Following ICTV guidelines [1, 2], the first nt of the nonanucleotide motif was considered as 'position one' of the Mon sequences.
