# Supplementary material for: Detection and Complete Genome Analysis of Circoviruses and Cycloviruses in the Small Indian Mongoose (Urva auropunctata): Identification of Novel Species
Source: Viruses. 2021 Aug 27;13(9):1700. doi: 10.3390/v13091700 (PMC8471302; doi:10.3390/v13091700)
Supplement: Supplementary file 1 [file viruses-13-01700-s001.zip › Supplementary material S2.pdf]

**Supplementary material S2.** The presence of the arginine rich region in amino terminus of putative capsid proteins of mongoose associated circoviruses (Mon-1 and -29) and cycloviruses (Mon-20, -24, -32, -58, -60 and -62). A '-' denotes absence of an amino acid (aa) residue at that position. Numbers to the right indicate the positions of the aa for respective sequences.

|        |                                                              |    |
|--------|--------------------------------------------------------------|----|
| Mon-1  | -----MSRRYRLRRLRPRRSYVRRRHYYRRRRYWRRP-----YIRR--PRAGAYFIQR   | 45 |
| Mon-29 | -----MSRRYRLRRLRPRRSYVRRRHYYRRRRYWRRP-----YIRR--PRAGAYFIQR   | 45 |
| Mon-66 | ---MNQYPQKRKGYTVLNNDYKRRRLNQORENAFWNQVGAMSDMYQSRGNFRTQAAFKKE | 57 |
| Mon-20 | -----MRRLRR-VRRAYRRLRRRGSKFRRR-----FRRR--NRAS--LACK          | 36 |
| Mon-24 | -----MRRLRR-VRRAYRRLRRRGSKFRRR-----FRRR--NRAS--LACK          | 36 |
| Mon-32 | -----MALRRVRRYFKRPLRRVHRRRRMFRRR-----YTKR--SRSTPTLACK        | 41 |
| Mon-58 | MAFRRRIVRRRAPVTRRGLFRRRARPFTRRRLALRRA-----RARK--ASQRFTLHAR   | 52 |
| Mon-60 | MAFRRRIVRRRAPVTRRGLFRRRARPFTRRRLALRRA-----RARK--ASQRFTLHAR   | 52 |
| Mon-62 | MAFRRRIVRRRAPVTRRGLFRRRARPFTRRRLALRRA-----RARK--ASQRFTLHAR   | 52 |
