# Supplementary material for: Detection and Complete Genome Analysis of Circoviruses and Cycloviruses in the Small Indian Mongoose (Urva auropunctata): Identification of Novel Species
Source: Viruses. 2021 Aug 27;13(9):1700. doi: 10.3390/v13091700 (PMC8471302; doi:10.3390/v13091700)
Supplement: Supplementary file 1 [file viruses-13-01700-s001.zip › Supplementary material S6.pdf]

**Supplementary material S6.** Identification of inter-species recombination event involving mongoose associated cyclovirus strain Mon-32, as determined by the Recombination Detection Program (RDP v.4.101). A sequence was identified as a recombinant if it was detected by more than two methods with a highest acceptable *p-value* of  $p < 0.01$  with Bonferroni's correction.

**Recombinant:** Goat associated cyclovirus 1 (isolate PKgoat11), GenBank accession number HQ738636

**Major parent:** Unknown

**Minor parent:** Mongoose associated cyclovirus strain Mon-32

**Recombinant region:** nt 1174-nt 45

Confirmation table generated by RDP v.4.101 program.

| <b><i>Method</i></b> | <b><i>Average p-value</i></b> |
|----------------------|-------------------------------|
| RDP                  | $4.973 \times 10^{-15}$       |
| GENECONV             | $1.813 \times 10^{-12}$       |
| BootScan             | $8.837 \times 10^{-18}$       |
| MaxChi               | $7.541 \times 10^{-16}$       |
| Chimaera             | $2.776 \times 10^{-13}$       |
| SiScan               | $5.826 \times 10^{-26}$       |
| 3Seq                 | $2.226 \times 10^{-05}$       |
